# Supplementary material
Source: MDPI journal article supplement (https://www.mdpi.com/2076-3417/11/11/4744)
Supplement: s1 [file s1]

## Supplementary Material

**Table 1S.** Calibration data used for the quantification of individual phenolic compounds in *S. ramosissima* extracts.

| Compounds                             | (m ± m) <sup>a</sup> | (b ± b) <sup>b</sup> | r <sup>2</sup> | LOD <sup>c</sup> (mg/L) | LOQ <sup>d</sup> (mg/L) |
|---------------------------------------|----------------------|----------------------|----------------|-------------------------|-------------------------|
| <b>Phenolic acids</b>                 |                      |                      |                |                         |                         |
| Gallic acid                           | 54220 ± 97           | 57.7 ± 6             | 0.9999         | 0.120                   | 0.400                   |
| Protocatechuic acid                   | 32064 ± 24           | 1024 ± 477           | 0.9999         | 0.104                   | 0.346                   |
| Chlorogenic acid                      | 27244 ± 57           | -1445 ± 144          | 0.9999         | 0.292                   | 0.972                   |
| Vanillic acid                         | 36254 ± 55           | 1215 ± 121           | 0.9999         | 0.215                   | 0.715                   |
| Caffeic acid                          | 69190 ± 45           | 124 ± 12             | 0.9999         | 0.090                   | 0.302                   |
| Syringic acid                         | 61262 ± 72           | 2088 ± 209           | 0.9999         | 0.165                   | 0.551                   |
| <i>p</i> -coumaric acid               | 146520 ± 1176        | -33763 ± 3376        | 0.9991         | 1.70                    | 5.68                    |
| Ferulic acid                          | 61448 ± 39           | 1501.6 ± 789         | 0.9999         | 0.089                   | 0.298                   |
| Sinapic acid                          | 29742 ± 16           | 124 ± 12             | 0.9999         | 0.075                   | 0.25                    |
| 3,5-di- <i>O</i> -caffeoylquinic acid | 62289 ± 829          | -11003 ± 3153        | 0.9991         | 0.341                   | 1.13                    |
| 3,4-di- <i>O</i> -caffeoylquinic acid | 28503 ± 410          | 32 ± 3               | 0.9991         | 0.383                   | 1.27                    |
| Ellagic acid                          | 44947 ± 1040         | -30767 ± 20152       | 0.9973         | 3.09                    | 10.3                    |
| Cinnamic acid                         | 183447 ± 103         | 2472 ± 247           | 0.9999         | 0.079                   | 0.263                   |
| <b>Flavanols</b>                      |                      |                      |                |                         |                         |
| Catechin                              | 13826 ± 56           | 3021 ± 1127          | 0.9999         | 0.568                   | 1.89                    |
| Epicatechin                           | 15117 ± 60           | 1178 ± 118           | 0.9999         | 0.558                   | 1.86                    |
| <b>Flavanones</b>                     |                      |                      |                |                         |                         |
| Naringin                              | 36536 ± 25           | 1384 ± 499           | 0.9999         | 0.095                   | 0.317                   |
| Naringenin                            | 68101 ± 90           | -2516 ± 1813         | 0.9999         | 0.186                   | 0.619                   |
| <b>Flavonols</b>                      |                      |                      |                |                         |                         |
| Rutin                                 | 83207 ± 51           | 1937 ± 1034          | 0.9999         | 0.087                   | 0.289                   |

| Compounds                 | (m ± sm) <sup>a</sup> | (b ± sb) <sup>b</sup> | r <sup>2</sup> | LOD <sup>c</sup> (mg/L) | LOQ <sup>d</sup> (mg/L) |
|---------------------------|-----------------------|-----------------------|----------------|-------------------------|-------------------------|
| Quercetin-3-O-galactoside | 23597 ± 27            | 466 ± 47              | 0.9999         | 0.159                   | 0.531                   |
| Myricetin                 | 27506 ± 260           | -12304 ± 5242         | 0.995          | 1.32                    | 4.43                    |
| Kaempferol-3-O-glucoside  | 22171 ± 45            | 792 ± 79              | 0.9999         | 0.286                   | 0.955                   |
| Kaempferol-3-O-rutinoside | 24228 ± 55            | -1094 ± 109           | 0.9999         | 0.319                   | 1.06                    |
| Quercetin                 | 30017 ± 212           | -7386 ± 739           | 0.9997         | 0.992                   | 3.30                    |
| Tiliroside                | 67386 ± 95            | -1771 ± 177           | 0.9999         | 0.198                   | 0.658                   |
| Kaempferol                | 33473 ± 102           | -3301 ± 330           | 0.9999         | 0.430                   | 1.43                    |
| <b>Flavones</b>           |                       |                       |                |                         |                         |
| Apigenin                  | 100189 ± 353          | -7277 ± 727           | 0.9999         | 0.495                   | 1.65                    |
| Chrysin                   | 88535 ± 143           | -3131 ± 313           | 0.9999         | 0.226                   | 0.755                   |
| <b>Others</b>             |                       |                       |                |                         |                         |
| Phloridzin                | 47726 ± 42            | 78 ± 8                | 0.9999         | 0.125                   | 0.416                   |
| Phloretin                 | 71734 ± 154           | 84 ± 8                | 0.9999         | 0.302                   | 1.01                    |

<sup>a</sup>m: slope ± standard deviation (n = 5) expressed in µV min/mg L; <sup>b</sup>b: intercept ± standard deviation (n = 5) expressed in µV min; <sup>c</sup>LOD: limit of detection; <sup>d</sup>LOQ: limit of quantification.
